# Supplementary material
Source: PubMed Central journal article supplement (PMC6789276)
Supplement: ajtr0011-5998-f6.pdf [file ajtr0011-5998-f6.pdf]

YJP inhibits liver fibrosis by blocking the MAPK and PI3K/Akt pathways

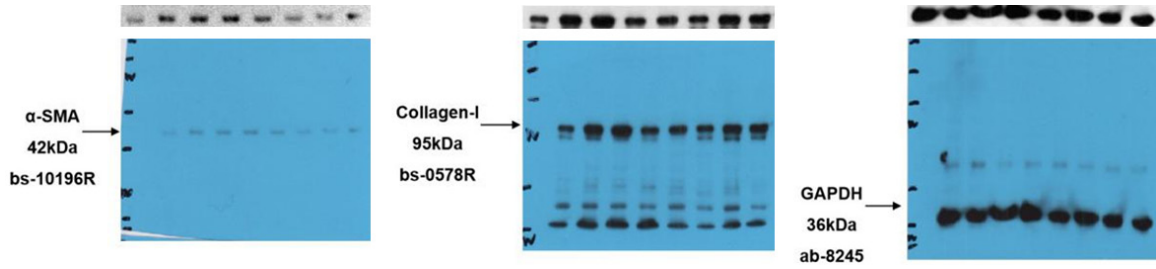

**Figure S1.** Relative protein levels of  $\alpha$ -SMA and collagen type I (collagen-1) detected by Western blotting. The protein levels were normalized by GAPDH. There are original images of  $\alpha$ -SMA, collagen-1 and GAPDH. Same as the above grouping, from left to right are normal, CCl4, CCl4+YJP-100 mg/kg, CCl4+YJP-200 mg/kg, CCl4+YJP-300 mg/kg, YJP-300 mg/kg alone, silybin-100 mg/kg and FZHY capsule-2 g/kg.

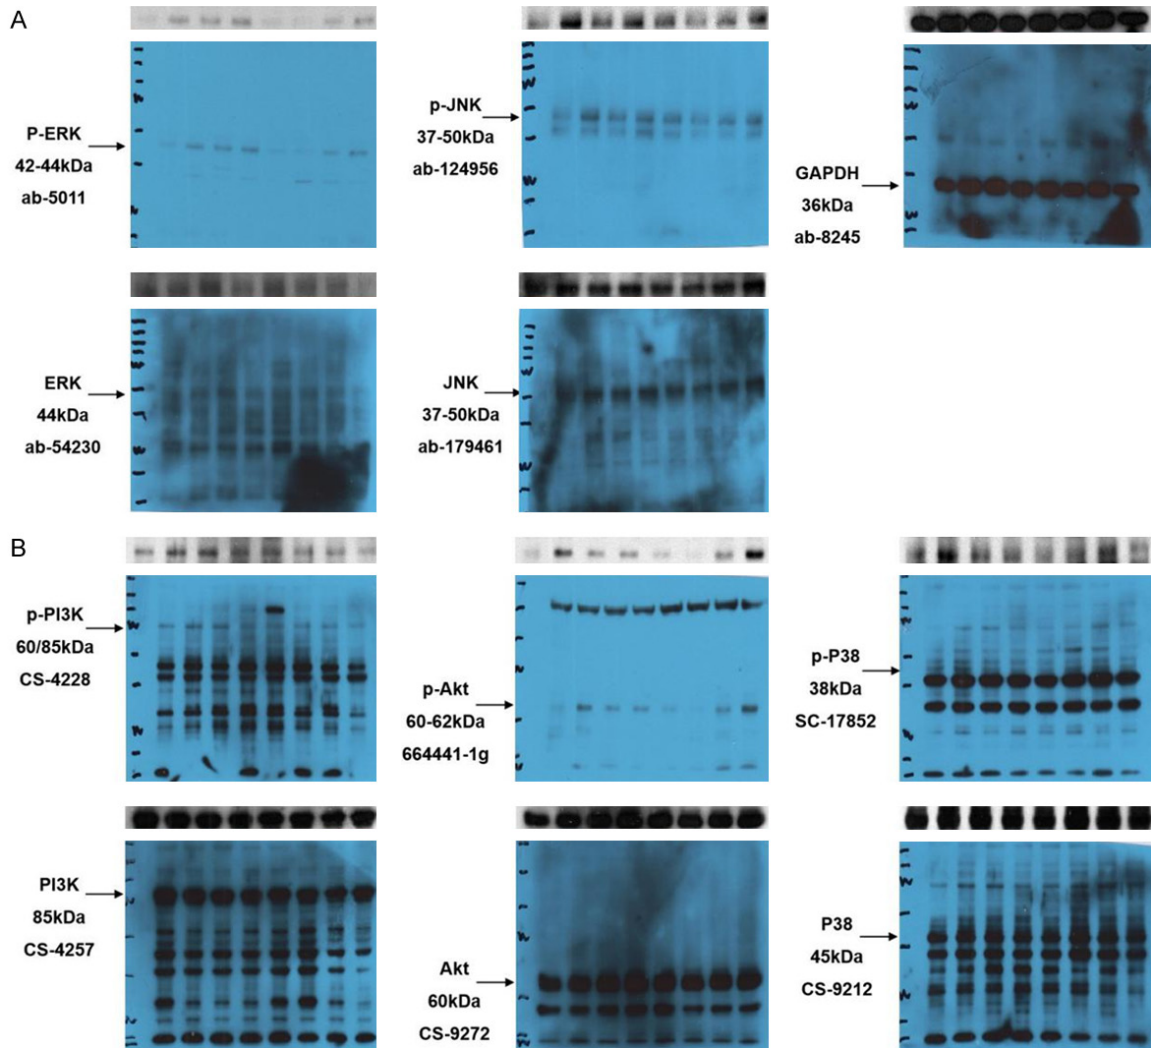

**Figure S2.** A. Relative protein levels of p-ERK and p-JNK detected by Western blotting. B. Relative protein levels of p-PI3K, p-Akt and p-P38 detected by Western blotting. The protein levels were normalized by GAPDH. There are original images of ERK, JNK, PI3K, Akt, p38, p-ERK, p-JNK, p-PI3K, p-Akt, p-p38 and GAPDH. Grouping is the same as Figure S1.
